# Supplementary material for: Listeria monocytogenes isolates from Western Cape, South Africa exhibit resistance to multiple antibiotics and contradicts certain global resistance patterns
Source: PubMed Central journal article supplement (PMC7921373; doi:10.3934/microbiol.2021004), 2021-01-19
Supplement: microbiol-07-01-004-s001.pdf [file microbiol-07-01-004-s001.pdf]

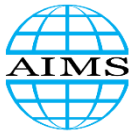

<http://www.aimspress.com/journal/microbiology>

*Research article*

## ***Listeria monocytogenes* isolates from Western Cape, South Africa exhibit resistance to multiple antibiotics and contradicts certain global resistance patterns**

**Rochelle Keet and Diane Rip\***

Department of Food Science, Centre for Food Safety, Stellenbosch University, South Africa

\* **Correspondence:** Email: [dirip@sun.ac.za](mailto:dirip@sun.ac.za).

**Table S1.** Studies indicating the prevalence of antibiotic resistance of *Listeria monocytogenes* to ampicillin, chloramphenicol, erythromycin, gentamicin, and tetracycline

| Antibiotic | Origin                                | Reference | <i>L. monocytogenes</i> isolates resistant/isolates tested (%) |
|------------|---------------------------------------|-----------|----------------------------------------------------------------|
| Ampicillin | Clinical, USA                         | [67]      | 6/65 (9.2%)                                                    |
|            | Clinical, Iran                        | [64]      | 14/14 (100%)                                                   |
|            | Seafood, Iran                         | [9]       | 107/278 (38.5%)                                                |
|            | Seafood (open-air fish markets), Iran | [60]      | 9/43 (20.9%)                                                   |
|            | Chicken, Iran                         | [64]      | 14/14 (100%)                                                   |
|            | Poultry, Iran                         | [30]      | 44/98 (44.9%)                                                  |
|            | Raw meat, Italy                       | [65]      | 8/40 (20%)                                                     |
|            | Pork, China                           | [79]      | 3/26 (11.5%)                                                   |
|            | Meat products, Turkey                 | [66]      | 5/66 (7.5%)                                                    |
|            | Dairy products, Iran                  | [32]      | 5/19 (26.3%)                                                   |
|            | RTE products, Spain                   | [31]      | 8/25 (32%)                                                     |
|            | RTE products, Poland                  | [53]      | 20/210 (9.5%)                                                  |

*Continued on next page*

| Antibiotic      | Origin                                | Reference | <i>L. monocytogenes</i> isolates resistant/isolates tested (%) |
|-----------------|---------------------------------------|-----------|----------------------------------------------------------------|
| Chloramphenicol | Clinical, USA                         | [67]      | 7/54 (12.9%)                                                   |
|                 | Seafood, Iran                         | [9]       | 9/278 (3.2%)                                                   |
|                 | Seafood (open-air fish markets), Iran | [60]      | 1/43 (2.3%)                                                    |
|                 | Poultry, Iran                         | [30]      | 24/98 (24.5%)                                                  |
|                 | Dairy products, Iran                  | [32]      | 2/19 (10.5%)                                                   |
|                 | Vegetables, Nigeria                   | [93]      | 60/104 (57.7%)                                                 |
|                 | RTE meat products, China              | [100]     | 11/33 (33.3%)                                                  |
| Erythromycin    | Clinical, USA                         | [67]      | 1/84 (1.9%)                                                    |
|                 | Seafood, Iran                         | [9]       | 7/278 (2.5%)                                                   |
|                 | Seafood (open-air fish markets), Iran | [60]      | 12/43 (27.9%)                                                  |
|                 | Seafood, Poland                       | [101]     | 33/70 (47.1%)                                                  |
|                 | Poultry, Iran                         | [30]      | 15/98 (15.3%)                                                  |
|                 | Raw meat, Italy                       | [65]      | 2/40 (5%)                                                      |
|                 | Pork, China                           | [79]      | 3/26 (11.5%)                                                   |
|                 | Dairy products, Iran                  | [32]      | 3/19 (15.8%)                                                   |
|                 | Vegetables, Nigeria                   | [93]      | 23/104 (22.1%)                                                 |
| Gentamycin      | Clinical, USA                         | [67]      | 2/52 (2%)                                                      |
|                 | Clinical, Iran                        | [64]      | 1/14 (7.1%)                                                    |
|                 | Seafood, Iran                         | [9]       | 2/278 (0.72%)                                                  |
|                 | Chicken, Iran                         | [64]      | 1/14 (7.1%)                                                    |
|                 | Poultry, Iran                         | [30]      | 10/98 (10.2%)                                                  |
|                 | Raw meat, Italy                       | [65]      | 3/40 (7.5%)                                                    |
|                 | Pork, China                           | [79]      | 1/26 (3.9%)                                                    |
|                 | Dairy products, Iran                  | [32]      | 1/19 (5.3%)                                                    |
|                 | Vegetables, Nigeria                   | [93]      | 33/104 (31.7%)                                                 |
|                 | RTE products, Spain                   | [31]      | 1/25 (4%)                                                      |
| Tetracycline    | Clinical, USA                         | [67]      | 2/66 (3%)                                                      |
|                 | Seafood, Iran                         | [9]       | 52/278 (18.7%)                                                 |
|                 | Poultry, Iran                         | [30]      | 34/98 (34.7%)                                                  |
|                 | Raw meat, Italy                       | [65]      | 1/40 (2.5%)                                                    |
|                 | Chilled pork, China                   | [79]      | 7/26 (26.9%)                                                   |
|                 | Dairy products, Iran                  | [32]      | 3/19 (15.8%)                                                   |
|                 | Vegetables, Nigeria                   | [93]      | 32/104 (30.8%)                                                 |
|                 | RTE products, Spain                   | [31]      | 12/25 (48%)                                                    |
|                 | RTE meat products, China              | [100]     | 4/33 (12.1%)                                                   |
|                 | Food processing environment, Canada   | [102]     | 3/54 (5.6%)                                                    |

**Table S2.** *Listeria monocytogenes* isolates from the period 2017–2019 showing resistance to one or more antibiotic in various categories (isolates susceptible to all antibiotics not shown). MDR isolates highlighted in bold.

| Sample                                  | Category             | <sup>a</sup> Subcategory (additional description, as provided by supplier) | <sup>b</sup> Lineage | Ampicillin | Chloramphenicol | Erythromycin | Gentamicin | Tetracycline |
|-----------------------------------------|----------------------|----------------------------------------------------------------------------|----------------------|------------|-----------------|--------------|------------|--------------|
| <i>Clinical: total tested n=20</i>      |                      |                                                                            |                      |            |                 |              |            |              |
| CLM17                                   | <b>Clinical</b>      | <b>Unknown</b>                                                             | <b>I</b>             | -          | <b>R</b>        | <b>R</b>     | <b>R</b>   | <b>R</b>     |
| <i>Environmental: total tested n=31</i> |                      |                                                                            |                      |            |                 |              |            |              |
| MEN30                                   | Environmental        | Drain (preparation area)                                                   | I                    | -          | R               | R            | -          | -            |
| MEN34                                   | Environmental        | Drain (production)                                                         | I                    | -          | -               | R            | -          | -            |
| MEN26                                   | Environmental        | Drain (preparation area)                                                   | I                    | -          | R               | -            | -          | -            |
| MEN31                                   | Environmental        | Drain (cooking area)                                                       | II                   | -          | R               | R            | -          | -            |
| MEN47                                   | Environmental        | Drain                                                                      | I                    | -          | R               | R            | -          | -            |
| MEN01                                   | Environmental        | Drain (mixer)                                                              | I                    | -          | -               | -            | R          | -            |
| MEN04                                   | Environmental        | Drain (mixer)                                                              | I                    | -          | -               | R            | -          | -            |
| MEN48                                   | Environmental        | Equipment                                                                  | I                    | -          | -               | R            | -          | -            |
| MEN11                                   | Environmental        | Equipment                                                                  | I                    | -          | -               | R            | -          | -            |
| MEN36                                   | Environmental        | Floor                                                                      | II                   | -          | -               | R            | -          | -            |
| MEN38                                   | <b>Environmental</b> | <b>Hand (during production)</b>                                            | <b>II</b>            | -          | <b>R</b>        | <b>R</b>     | -          | <b>R</b>     |
| MEN14                                   | Environmental        | Surface (red cutting boards)                                               | II                   | -          | R               | R            | -          | -            |
| MEN15                                   | Environmental        | Surface (production tables)                                                | II                   | -          | -               | R            | -          | -            |
| MVA03                                   | Environmental        | Unknown                                                                    | II                   | -          | -               | R            | -          | -            |

*Continued on next page*

| Sample                              | Category         | <sup>a</sup> Subcategory (additional description, as provided by supplier) | <sup>b</sup> Lineage | Ampicillin | Chloramphenicol | Erythromycin | Gentamicin | Tetracycline |
|-------------------------------------|------------------|----------------------------------------------------------------------------|----------------------|------------|-----------------|--------------|------------|--------------|
| <i>Raw meats: total tested n=31</i> |                  |                                                                            |                      |            |                 |              |            |              |
| MRA32                               | <b>Raw meats</b> | <b>Beef (mince)</b>                                                        | <b>II</b>            | -          | -               | <b>R</b>     | <b>R</b>   | <b>R</b>     |
| MRA32a                              | Raw meats        | Beef (mince)                                                               | II                   | -          | -               | R            | -          | -            |
| MRA18                               | <b>Raw meats</b> | <b>Beef</b>                                                                | <b>I</b>             | -          | <b>R</b>        | <b>R</b>     | -          | <b>R</b>     |
| MRA03                               | Raw meats        | Beef (mince)                                                               | II                   | -          | -               | R            | -          | -            |
| MRA31                               | Raw meats        | Chicken (whole birds)                                                      | I                    | -          | -               | -            | -          | R            |
| MRA34                               | Raw meats        | Chicken (fresh breasts)                                                    | I                    | -          | -               | R            | -          | R            |
| MRA42                               | Raw meats        | Chicken (frozen thighs)                                                    | I                    | -          | -               | -            | -          | R            |
| MRA43                               | Raw meats        | Chicken (pieces)                                                           | II                   | -          | -               | -            | -          | R            |
| MRA46                               | Raw meats        | Chicken (mixed portions)                                                   | I                    | -          | -               | -            | -          | R            |
| MRA17                               | Raw meats        | Chicken (drumsticks)                                                       | I                    | -          | -               | R            | -          | R            |
| MRA36                               | <b>Raw meats</b> | <b>Pork (BBQ portions)</b>                                                 | <b>II</b>            | -          | <b>R</b>        | <b>R</b>     | -          | <b>R</b>     |
| MRA23                               | Raw meats        | Unknown                                                                    | I                    | -          | -               | R            | -          | -            |
| MRA26a                              | <b>Raw meats</b> | <b>Unknown</b>                                                             | <b>II</b>            | -          | <b>R</b>        | <b>R</b>     | -          | <b>R</b>     |
| MRA26                               | Raw meats        | Unknown                                                                    | II                   | -          | R               | R            | -          | -            |
| MRA20                               | Raw meats        | Unknown                                                                    | I                    | -          | R               | R            | -          | -            |
| MRA11                               | Raw meats        | Unknown                                                                    | I                    | -          | -               | R            | -          | -            |
| MRA13                               | Raw meats        | Unknown                                                                    | I                    | -          | -               | -            | R          | -            |
| MRA14                               | Raw meats        | Unknown                                                                    | I                    | -          | -               | R            | -          | -            |
| MRA20a                              | Raw meats        | Unknown                                                                    | I                    | -          | -               | R            | -          | -            |
| MRA21                               | Raw meats        | Unknown                                                                    | I                    | -          | R               | R            | -          | -            |
| MRA33                               | Raw meats        | Unknown                                                                    | II                   | -          | -               | R            | -          | -            |
| MRA30                               | Raw meats        | Unknown                                                                    | I                    | -          | -               | R            | -          | -            |

*Continued on next page*

| Sample                                 | Category            | <sup>a</sup> Subcategory (additional description, as provided by supplier) | <sup>b</sup> Lineage | Ampicillin | Chloramphenicol | Erythromycin | Gentamicin | Tetracycline |
|----------------------------------------|---------------------|----------------------------------------------------------------------------|----------------------|------------|-----------------|--------------|------------|--------------|
| <i>Raw seafood: total tested n=61</i>  |                     |                                                                            |                      |            |                 |              |            |              |
| MRA02                                  | Raw seafood         | Seafood                                                                    | I                    | -          | -               | -            | -          | R            |
| MVA02                                  | Raw seafood         | Seafood                                                                    | I                    | -          | -               | R            | -          | R            |
| MVA05                                  | Raw seafood         | Seafood                                                                    | I                    | -          | -               | R            | -          | -            |
| MVA30                                  | Raw seafood         | Seafood                                                                    | I                    | -          | -               | R            | -          | -            |
| MVA38                                  | Raw seafood         | Seafood                                                                    | I                    | -          | R               | -            | -          | -            |
| MVA41                                  | Raw seafood         | Seafood                                                                    | I                    | -          | -               | R            | -          | -            |
| MVA44                                  | Raw seafood         | Seafood                                                                    | I                    | -          | -               | R            | -          | -            |
| MVA47                                  | Raw seafood         | Seafood                                                                    | I                    | -          | -               | R            | -          | -            |
| MVA56                                  | Raw seafood         | Seafood                                                                    | I                    | -          | -               | R            | -          | -            |
| MVA62                                  | Raw seafood         | Seafood                                                                    | II                   | -          | -               | -            | -          | R            |
| MVA65                                  | Raw seafood         | Seafood                                                                    | I                    | -          | -               | R            | -          | -            |
| <i>Ready-to-eat: total tested n=34</i> |                     |                                                                            |                      |            |                 |              |            |              |
| MRE21                                  | Ready-to-eat        | Deli meat (bacon breakfast griller)                                        | II                   | -          | -               | R            | -          | -            |
| MRE40                                  | Ready-to-eat        | Deli meat (cheese griller)                                                 | I                    | -          | -               | R            | -          | R            |
| MRE17                                  | Ready-to-eat        | Deli meat (pepper beef)                                                    | II                   | -          | -               | R            | -          | -            |
| MRA04                                  | Ready-to-eat        | Fresh produce                                                              | I                    | -          | -               | R            | -          | R            |
| MRE32                                  | <b>Ready-to-eat</b> | <b>Fresh produce (coriander after dipping)</b>                             | <b>I</b>             | <b>-</b>   | <b>-</b>        | <b>R</b>     | <b>R</b>   | <b>R</b>     |
| MRE38                                  | Ready-to-eat        | Hummus                                                                     | II                   | -          | R               | -            | -          | -            |

*Continued on next page*

| Sample | Category            | <sup>a</sup> Subcategory (additional description, as provided by supplier) | <sup>b</sup> Lineage | Ampicillin | Chloramphenicol | Erythromycin | Gentamicin | Tetracycline |
|--------|---------------------|----------------------------------------------------------------------------|----------------------|------------|-----------------|--------------|------------|--------------|
| MRE07  | Ready-to-eat        | Hummus                                                                     | II                   | -          | -               | R            | -          | -            |
| MRE08  | Ready-to-eat        | Hummus (red pepper)                                                        | II                   | -          | -               | R            | -          | -            |
| Hb6    | Ready-to-eat        | Polony                                                                     | II                   | -          | R               | -            | -          | -            |
| Hb4    | <b>Ready-to-eat</b> | <b>Polony</b>                                                              | <b>II</b>            | -          | <b>R</b>        | <b>R</b>     | -          | <b>R</b>     |

<sup>a</sup>Isolates from the same category are not necessarily from the same retail outlet, or environmental origin. Isolates with similar descriptions are not referring to duplicates.

<sup>b</sup>These isolates were characterised into lineage groups by PCR-RFLPs [51].

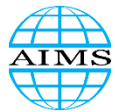

AIMS Press

© 2021 the Author(s), licensee AIMS Press. This is an open access article distributed under the terms of the Creative Commons Attribution License (<http://creativecommons.org/licenses/by/4.0>)
